# Supplementary material
Source: Research Square preprint supplement (doi:10.21203/rs.3.rs-10094062/v1)
Supplement: Supplementary file 1 [file e2f6c81f95cec15d3ecbadce.docx]

Supplementary Materials

The Unlock System: Conceptual Overview, Scoring Model, and Validation Framework

Title: Counseling in the Age of AI: A Pilot Study on Human Empathy Expansion Through Facilitated AI Persona Engagement

**Contents**

1. Conceptual Overview
2. The Eight Empathy Signals
3. Signal Weighting and Scoring Model
4. Tier Transition Logic
5. Validation Framework
6. References (Supplementary)

**1. Conceptual Overview**

The following is an overview of the AI Persona unlock system that operates behind the scenes in the present study.

This system is a progressive trust model designed to simulate how emotional safety develops in real human relationships. Rather than responding to single empathic statements, the system evaluates patterns of interpersonal behavior over time.

Core Principle

Emotional disclosure is not triggered by correctness, it is triggered by perceived safety.

The AI persona's responses are governed by three tiers:

| Tier | Description | Psychological Analog |
| --- | --- | --- |
| Tier 1: Surface Openness | Minimal disclosure; defensive, vague, or deflective responses; emotional state acknowledged but not explored | Guarded attachment / low perceived safety |
| Tier 2: Emotional Recognition | Feelings are named and partially explored; context begins to emerge; reduced defensiveness | Moderate trust / affect labeling activation |
| Tier 3: Core Wound Disclosure | Deep emotional truth, vulnerability, or past pain revealed; narrative coherence increases; defensive strategies drop significantly | High trust / attachment activation / vulnerability threshold crossed |

**2. The Eight Empathy Signals**

The system evaluates user responses across eight distinct interpersonal signals. Each signal is based on established psychological theory.

**2.1 Presence Without Pressure**

**Definition:** Remaining engaged without pushing for deeper disclosure.

**Mechanism:**

- Reduces perceived social threat
- Supports autonomy, which is critical for voluntary disclosure

**Scientific Mapping:**

- Self-Determination Theory (Deci & Ryan): autonomy increases intrinsic openness
- Polyvagal Theory: absence of pressure lowers defensive activation

**System Function:**

- Prevents regression at Tier 1
- Establishes baseline safety

**2.2 Emotional Labeling**

**Definition:** Accurately identifying and naming the persona's emotional state.

**Mechanism:**

- Activates affect labeling, reducing amygdala activity
- Enhances emotional clarity and regulation

**Scientific Mapping:**

- Lieberman et al. (2007): affect labeling reduces emotional reactivity
- Emotional Intelligence frameworks (Goleman)

**System Function:**

- Primary driver of transition into Tier 2
- Signals "I see you" at a cognitive-emotional level

**2.3 Gentle Curiosity**

**Definition:** Asking open-ended, non-invasive questions.

**Mechanism:**

- Encourages elaboration without triggering defensiveness
- Maintains perceived control over disclosure

**Scientific Mapping:**

- Motivational Interviewing (Miller & Rollnick)
- Socratic questioning (non-threatening inquiry)

**System Function:**

- Expands emotional depth without overwhelming
- Supports gradual narrative formation

**2.4 Validation**

**Definition:** Acknowledging emotions as understandable without fixing or correcting them.

**Mechanism:**

- Reduces shame and self-judgment
- Increases relational safety

**Scientific Mapping:**

- Dialectical Behavior Therapy (Linehan): validation reduces emotional dysregulation
- Attachment repair dynamics

**System Function:**

- Stabilizes Tier 2
- Critical for preventing withdrawal or shutdown

**2.5 Patience Over Urgency**

**Definition:** Allowing pauses, incomplete thoughts, and emotional pacing.

**Mechanism:**

- Prevents cognitive/emotional overload
- Signals tolerance for discomfort

**Scientific Mapping:**

- Window of Tolerance (Siegel)
- Emotional regulation pacing

**System Function:**

- Maintains nervous system safety
- Enables deeper processing - necessary for Tier 3

**2.6 Personal Vulnerability**

**Definition:** Sharing one's own emotional experience in a way that parallels, but does not override, the persona's experience.

**Mechanism:**

- Activates reciprocity norm
- Signals relational equality and authenticity

**Scientific Mapping:**

- Social Penetration Theory (Altman & Taylor)
- Reciprocal self-disclosure research

**System Function:**

- Accelerates movement toward Tier 3
- Must be balanced, overuse shifts focus away and breaks safety

**2.7 Consistency**

**Definition:** Maintaining a stable, supportive tone across multiple interactions.

**Mechanism:**

- Builds predictability, a key component of trust
- Reduces vigilance and testing behaviors

**Scientific Mapping:**

- Attachment Theory: consistent caregiving - secure attachment
- Behavioral reinforcement models

**System Function:**

- Converts momentary safety into enduring trust
- Required for sustained Tier 2 and entry into Tier 3

**2.8 Acknowledgment of Withdrawal**

**Definition:** Recognizing and gently naming the persona's emotional distance.

**Mechanism:**

- Demonstrates meta-awareness of relational dynamics
- Reduces invisibility and emotional isolation

**Scientific Mapping:**

- Rupture and Repair (Safran & Muran)
- Mentalization Theory (Fonagy)

**System Function:**

- Powerful trigger for deeper openness
- Often acts as a gateway to Tier 3 when done skillfully

**3. Signal Weighting and Scoring Model**

This section describes the semi-quantitative framework underlying the Unlock Tier System (UTS).

**3.1 Core Variable: Perceived Emotional Safety (PES)**

Each of the eight signals contributes to a running internal variable termed Perceived Emotional Safety (PES).

**Scale:** 0 - 100

Tiers activate at thresholds:

**Tier 1:** 0-39

**Tier 2:** 40-69

**Tier 3:** 70-100

Each user response is evaluated across the eight signals and contributes weighted points.

**3.2 Signal Weights (Based on Impact on Trust Formation)**

| Signal | Weight | Rationale |
| --- | --- | --- |
| Presence Without Pressure | +8 | Foundational safety; prevents regression |
| Emotional Labeling | +15 | Strong neurological regulation effect |
| Gentle Curiosity | +10 | Expands dialogue safely |
| Validation | +15 | Core to reducing shame and threat |
| Patience Over Urgency | +8 | Maintains regulation window |
| Personal Vulnerability | +12 | Accelerates bonding (high risk/reward) |
| Consistency | +20 (cumulative) | Converts moments into trust |
| Acknowledgment of Withdrawal | +12 | High-impact relational awareness |

**3.3 How Scoring Works (Per Response)**

Each response is evaluated on a three-point intensity scale:

- 0 = absent
- 0.5 = partial / weak
- 1 = clearly present

**Example Calculation:**
If a response includes:

- Emotional Labeling (1) - +15
- Validation (1) - +15
- Gentle Curiosity (0.5) - +5
- Total gain: +35 PES

**3.4 Decay and Penalty System**

Trust does not simply build, it can also degrade.

**Passive Decay:**

-3 per turn if no meaningful signal is present (simulates emotional drift / disengagement)

**Active Penalties:**

| Behavior | Penalty |
| --- | --- |
| Premature advice / fixing | –10 |
| Interrogation-style questioning | –8 |
| Emotional mismatch | –12 |
| Ignoring expressed emotion | –15 |
| Self-centered vulnerability | –10 |
| Inconsistency (tone shift) | –15 |

**3.5 Consistency Multiplier (Key Mechanic)**

Consistency is not merely additive, it amplifies gains.

- If 3+ consecutive responses show Validation + Emotional Labeling:
- Apply ×1.25 multiplier to total gain
- If 5+ consecutive responses maintain supportive tone:
- Apply ×1.5 multiplier

This models the principle that predictability leads to safety, which leads to faster trust acceleration.

**3.6 Tier Transition Conditions**

**Tier 1 to Tier 2 requires:**

- PES ≥ 40
- At least 1 Emotional Label
- At least 1 Validation
- No major penalties in last 2 turns

**Tier 2 to Tier 3 requires:**

- PES ≥ 70
- At least 1 Acknowledgment of Withdrawal OR 1 balanced Personal Vulnerability
- Consistency streak ≥ 3 turns

**3.7 Regression Conditions**

Even at high PES:

- Major mismatch: immediate drop to Tier 1
- Repeated minor misses: gradual regression
- This reflects the principle that trust is easier to lose than to gain.

**4. System Dynamics: How Progression Actually Occurs**

**4.1 Progression Logic**

**Progression is NOT:**

- Linear
- Triggered by one "correct" response

**Progression IS:**

- Weighted accumulation of signals
- Influenced by timing, tone, and emotional congruence

**4.2 Example of Progression Logic**

| Transition | Required Signal Combination |
| --- | --- |
| Tier 1 to Tier 2 | Emotional Labeling + Validation + Gentle Curiosity; supported by Presence Without Pressure |
| Tier 2 Stabilization | Consistency + Patience Over Urgency; continued Validation |
| Tier 2 to Tier 3 | Acknowledgment of Withdrawal + Personal Vulnerability (balanced) + Sustained Consistency |

**4.3 Failure States**

The system regresses when certain behaviors occur:

| Behavior | Effect |
| --- | --- |
| Fixing / problem-solving too early | Reduces validation |
| Interrogation-style questioning | Violates autonomy |
| Emotional mismatch (too intense or too detached) | Breaks attunement |
| Inconsistency | Resets trust accumulation |
| Self-focus during vulnerability | Perceived emotional abandonment |

These map to increased defensive activation and return to Tier 1 behaviors.

**5. Validation Framework**

This section outlines the methodological approach for empirically validating the Unlock Tier System.

**5.1 Construct Validation**

**Goal:** Demonstrate that PES meaningfully represents "emotional safety."

**Method:** Human raters evaluate conversations on:

- Perceived empathy
- Emotional safety
- Willingness to disclose

**Analysis:** Correlate PES scores with human ratings.

**Expected Outcome:** Strong positive correlation → validates PES as a meaningful construct.

**5.2 Behavioral Validation**

**Goal:** Demonstrate that tiers reflect real disclosure patterns.

**Method:** Measure across tiers:

- Length of responses
- Emotional word usage
- Depth of personal content

**Expected Pattern:**

| Tier | Expected Behavior |
| --- | --- |
| Tier 1 | Short, vague, deflective |
| Tier 2 | Moderate length, emotional language |
| Tier 3 | Long, narrative, autobiographical |

If this pattern holds, the tier system mirrors real human disclosure dynamics.

**5.3 Signal Sensitivity Testing**

**Goal:** Empirically verify that the eight signals matter.

**Method:** Systematically remove or vary signals:

- No validation
- No emotional labeling
- High curiosity but low patience

**Measures:**

- PES growth rate
- Tier progression speed

**Expected Findings:**

- Labeling + validation: strongest Tier 2 drivers
- Consistency: strongest Tier 3 stabilizer
- Withdrawal acknowledgment: high-impact trigger

**5.4 Failure Condition Validation**

**Goal:** Demonstrate that regression behaves realistically.

**Method:** Introduce:

- Advice-giving too early
- Emotional mismatch
- Inconsistent tone

**Measures:**

- PES drop magnitude
- Tier regression speed

**Expected Outcome:** Rapid loss of trust, mirroring human interaction dynamics.

**6. Key Scientific Framing**

The Unlock Tier System can be described in research contexts as:

*"A multi-signal empathy evaluation model that operationalizes emotional safety as a measurable latent variable (Perceived Emotional Safety; PES), dynamically updated through weighted interpersonal behaviors and mapped to progressive disclosure states."*

**6.1 Why This Model Matters for Empathy Research**

This system demonstrates that empathy is not:

- A trait
- A single response
- A scripted technique

**Empathy is:**

A dynamic, multi-signal process that regulates another person's sense of emotional safety over time.

**6.2 Key Insight**

Empathy works not because it is "kind," but because it:

- Reduces threat
- Increases predictability
- Preserves autonomy
- Signals understanding

**7. Supplementary References**

The following references support the theoretical grounding of the UTS framework:

Beckes, L.; Coan, J. A. Social Baseline Theory: The Role of Social Proximity in Emotion and Economy of Action. Soc. Personal. Psychol. Compass 2011, 5 (12), 976–988. <https://doi.org/10.1111/j.1751-9004.2011.00400.x>

Coan, J. A.; Sbarra, D. A. Social Baseline Theory: The Social Regulation of Risk and Effort. Curr. Opin. Psychol. 2015, 1, 87–91. <https://doi.org/10.1016/j.copsyc.2014.12.021>

Decety, J.; Cowell, J. M. The Complex Relation between Morality and Empathy. Trends Cognit. Sci. 2014, 18 (7), 337–339. <https://doi.org/10.1016/j.tics.2014.04.008>

Edmondson, A. C.; Lei, Z. Psychological Safety: The History, Renaissance, and Future of an Interpersonal Construct. Annu. Rev. Organ. Psychol. Organ. Behav. 2014, 1, 23–43. <https://doi.org/10.1146/annurev-orgpsych-031413-091305>

Farber, B. A.; Suzuki, J. Y.; Lynch, D. A. Positive Regard and Psychotherapy Outcome: A Meta-Analytic Review. Psychotherapy 2018, 55 (4), 411–423. <https://doi.org/10.1037/pst0000171>

Feldman, R. The Neurobiology of Human Attachments. Trends Cognit. Sci. 2017, 21 (2), 80–99. <https://doi.org/10.1016/j.tics.2016.11.007>

Lieberman, M. D.; Eisenberger, N. I.; Crockett, M. J.; Tom, S. M.; Pfeifer, J. H.; Way, B. M. Putting Feelings into Words. Psychol. Sci. 2007, 18 (5), 421–428. <https://doi.org/10.1111/j.1467-9280.2007.01916.x>

Reis, H. T.; Clark, M. S. Responsiveness. In The Oxford Handbook of Close Relationships; Simpson, J. A., Campbell, L., Eds.; Oxford University Press: New York, 2013; pp 400–423. <https://doi.org/10.1093/oxfordhb/9780195398694.001.0001>

Simpson, J. A.; Rholes, W. S. Adult Attachment, Stress, and Romantic Relationships. Curr. Opin. Psychol. 2017, 13, 19–24. <https://doi.org/10.1016/j.copsyc.2016.04.006>

Torre, J. B.; Lieberman, M. D. Putting Feelings into Words: Affect Labeling as Implicit Emotion Regulation. Emotion Rev. 2018, 10 (2), 116–124. <https://doi.org/10.1177/1754073917742706>

Weisz, E.; Cikara, M. Strategic Regulation of Empathy. Trends Cognit. Sci. 2021, 25 (3), 213–227. <https://doi.org/10.1016/j.tics.2020.12.002>

Zaki, J. Empathy: A Motivated Phenomenon. Psychol. Bull. 2014, 140 (6), 1608–1647. <https://psycnet.apa.org/doi/10.1037/a0037679>
